# Supplementary material
Source: PubMed Central journal article supplement (PMC4657840)
Supplement: ASN.2014111064_ASN2014111064SupplementaryData.pdf [file ASN.2014111064_ASN2014111064SupplementaryData.pdf]

**Supplementary Table 1.** Conventional diagnoses in 703 biopsies and biopsies with v-lesions

| Conventional diagnosis                             | All biopsies with v-lesions recorded (n = 673) | Median time post-transplant (range) (days) | Biopsies with v-lesions (n=49) | Median time post-transplant (range) (days) |
|----------------------------------------------------|------------------------------------------------|--------------------------------------------|--------------------------------|--------------------------------------------|
| <b>Rejection-related:</b>                          |                                                |                                            |                                |                                            |
| Pure T cell-mediated rejection (TCMR) <sup>a</sup> | 65 (10%)                                       | 137 (8 – 3878)                             | 30 (51%)                       | 95 (8 – 4986)                              |
| Pure Antibody-mediated rejection (ABMR)            | 104 (15%)                                      | 11453 (6 – 11453)                          | 0 (0%)                         | -                                          |
| <i>C4d-positive ABMR</i>                           | 28 (4%)                                        | 2256 (6 – 8419)                            | 0 (0%)                         | -                                          |
| <i>C4d-negative ABMR</i>                           | 76 (11%)                                       | 2076 (6 – 11453)                           | 0 (0%)                         | -                                          |
| Mixed rejection                                    | 27 (4%)                                        | 1835 (26 -5985)                            | 17 (35%)                       | 1011 (26 – 5985)                           |
| Borderline                                         | 87 (13%)                                       | 244 (7 – 8095)                             | 0 (0%)                         | -                                          |
| Transplant glomerulopathy (TG)                     | 24 (4%)                                        | 1953 (134 – 7191)                          | 0 (0%)                         | -                                          |
| <b>Other processes:</b>                            |                                                |                                            |                                |                                            |
| Polyoma virus nephropathy (PVN)                    | 25 (4%)                                        | 246 (110 – 1135)                           | 2 (4%)                         | 228 (183 – 272)                            |
| Glomerulonephritis (GN)                            | 77 (11%)                                       | 1830 (26 – 10436)                          | 0 (0%)                         | -                                          |
| Relatively normal                                  | 112 (17%)                                      | 390 (7 – 9056)                             | 0 (0%)                         | -                                          |
| Atrophy-fibrosis of unknown significance (IFTA)    | 69 (10%)                                       | 1703 (52 – 12831)                          | 0 (0%)                         | -                                          |
| Other uncommon diagnoses                           | 22 (3%)                                        | 277 (10 – 4685)                            | 0 (0%)                         | -                                          |
| <b>Total</b>                                       | <b>673</b>                                     | <b>564 (3 – 12831)</b>                     | <b>49</b>                      | <b>201 (8 – 5985)</b>                      |

<sup>a</sup> One biopsy previously called pure ABMR was recently reviewed and reclassified as TCMR, correcting a data entry error, making these numbers slightly different from previous analyses.

**Supplementary Table 2.** Response to therapy in 49 v-lesion biopsies

| <b>All biopsies (n=49)</b>                                 | <b>Mean Cr at biopsy<br/>(range)</b> | <b>Mean Cr at 1mo<br/>(range)</b> |
|------------------------------------------------------------|--------------------------------------|-----------------------------------|
| i-t-v (n=21)                                               | 307 (123 – 1469)                     | 167 (102 – 276) <sup>a</sup>      |
| isolated v (n=28)                                          | 236 (123 – 1087)                     | 173 (117 – 287)                   |
|                                                            |                                      |                                   |
| <b>Recorded treatment after biopsy (n=27)</b>              | <b>Mean Cr at biopsy<br/>(range)</b> | <b>Mean Cr at 1mo<br/>(range)</b> |
| i-t-v (n=14)                                               | 361 (125 – 1469)                     | 181 (132-276)                     |
| isolated v (n=13)                                          | 247 (123 – 1087)                     | 158 (117 – 219)                   |
|                                                            |                                      |                                   |
| <b>Recorded as no treatment after biopsy (n=5)</b>         | <b>Mean Cr at biopsy<br/>(range)</b> | <b>Mean Cr at 1mo<br/>(range)</b> |
| i-t-v (n=0)                                                | -                                    | -                                 |
| isolated v (n=5)                                           | 187 (167 – 244)                      | 191 (186 – 198)                   |
|                                                            |                                      |                                   |
| <b>No data available for treatment after biopsy (n=17)</b> | <b>Mean Cr at biopsy<br/>(range)</b> | <b>Mean Cr at 1mo<br/>(range)</b> |
| i-t-v (n=7)                                                | 198 (123 – 335)                      | 125 (102 – 159)                   |
| isolated v (n=10)                                          | 248 (176 – 397)                      | 189 (125 – 287)                   |

<sup>a</sup> p<0.05 when compared to Cr at biopsy in paired Student's t-test

**Supplementary Table 3.** Relationship of histologic microcirculation inflammation, cg scores, and C4d staining to molecular TCMR and ABMR scores in 28 biopsies with isolated v-lesions

| Molecular scores            | Microcirculation inflammation |                             | cg>0<br>(n=12) | cg=0<br>(n=16)  | C4d positive<br>(n=7) | C4d negative <sup>a</sup><br>(n=20) |
|-----------------------------|-------------------------------|-----------------------------|----------------|-----------------|-----------------------|-------------------------------------|
|                             | ptc + g-lesions>0<br>(n=16)   | ptc + g-lesions=0<br>(n=12) |                |                 |                       |                                     |
| TCMR>0.1                    | 3                             | 3                           | 2              | 4               | 2                     | 4                                   |
| TCMR<0.1                    | 13                            | 9 <sup>b</sup>              | 10             | 12 <sup>b</sup> | 5                     | 16 <sup>b</sup>                     |
| <i>p-value</i> <sup>b</sup> | 1                             |                             | 0.67           |                 | 0.63                  |                                     |
| ABMR>0.2                    | 10                            | 3                           | 11             | 2               | 7                     | 6                                   |
| ABMR<0.2                    | 6                             | 9 <sup>b</sup>              | 1              | 14 <sup>d</sup> | 0                     | 14 <sup>c</sup>                     |
| <i>p-value</i> <sup>b</sup> | 0.07                          |                             | <0.001         |                 | 0.002                 |                                     |

<sup>a</sup> One C4d biopsy did not have C4d testing performed.

<sup>b</sup> Fisher's exact test
